# Supplementary material for: Signatures of adaptive evolution during human to mink SARS CoV2 cross-species transmission inform estimates of the COVID19 pandemic timing
Source: bioRxiv or medRxiv preprint supplement (doi:10.1101/2021.09.15.459215), 2021-09-16
Supplement: Supplementary file [file media-1.pdf]

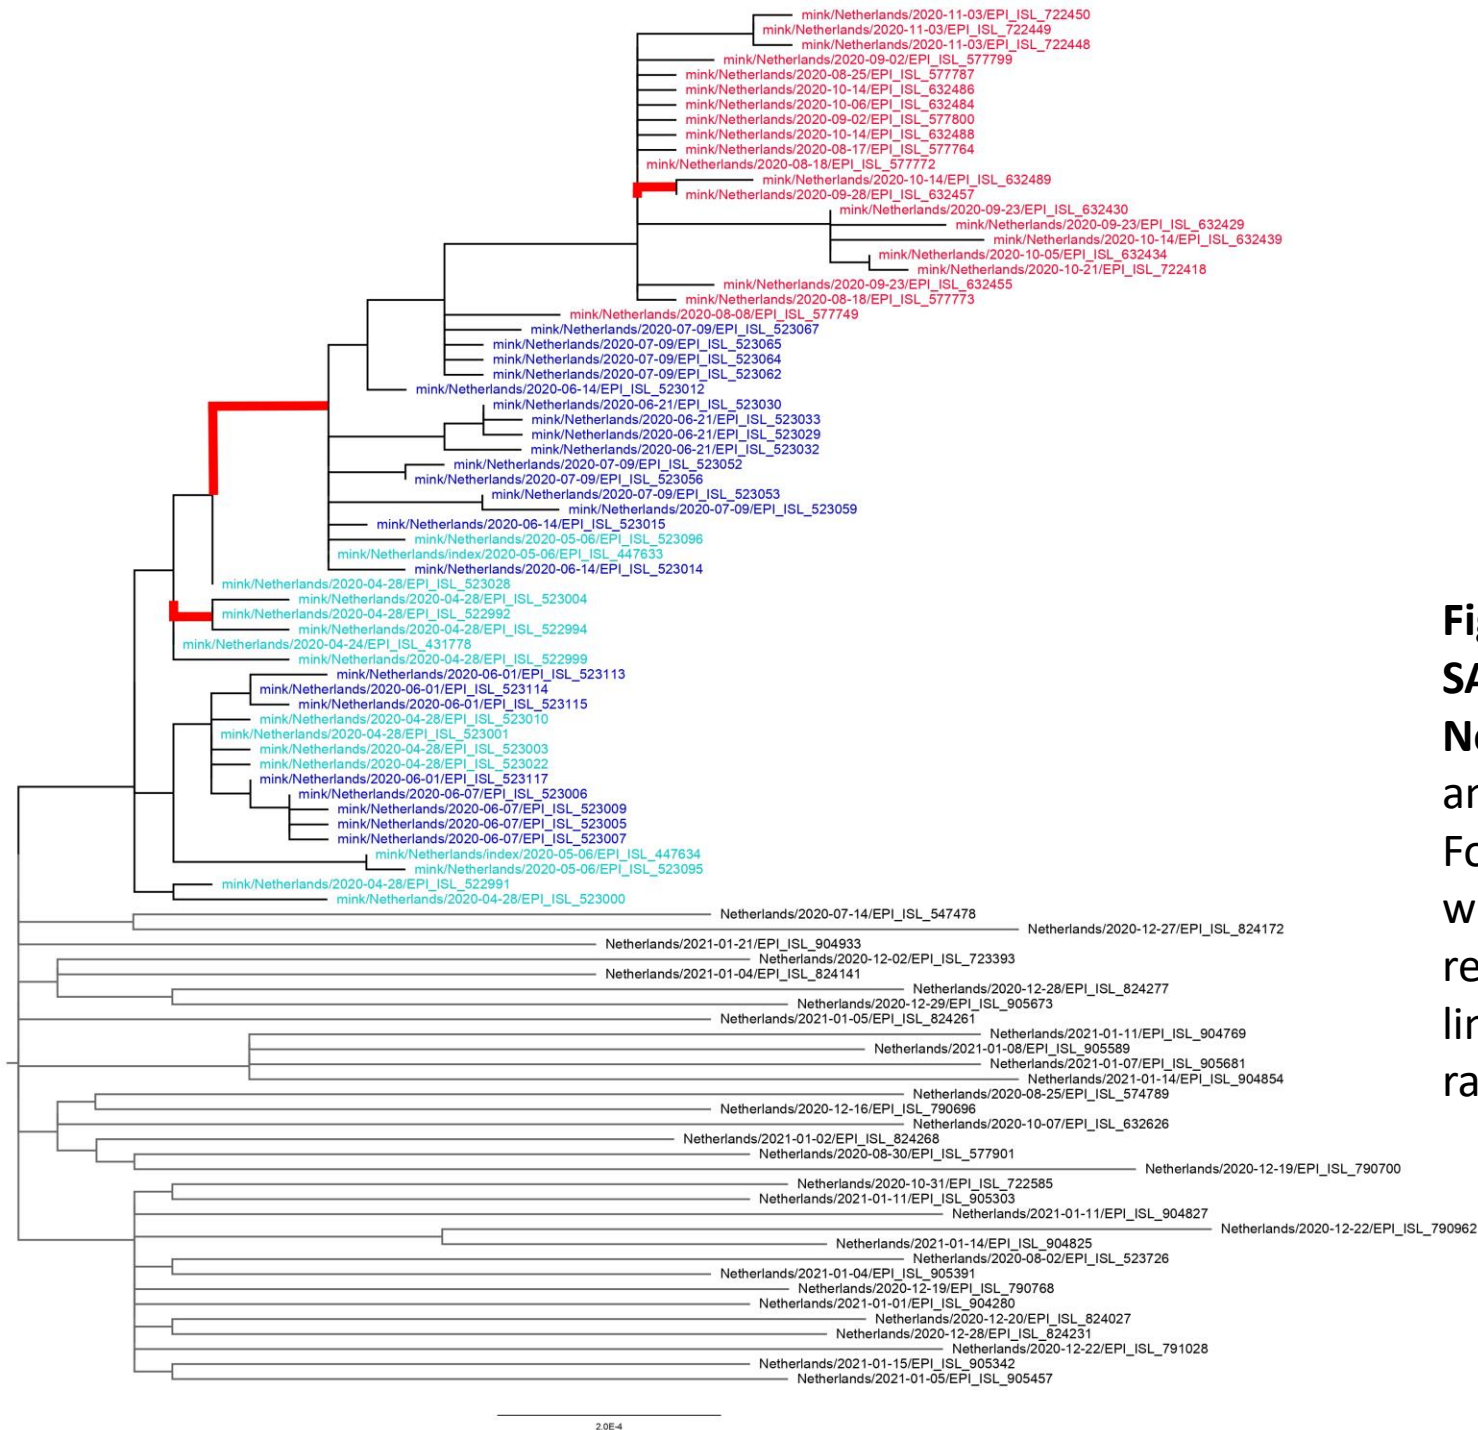

**Fig. S1** The maximum likelihood phylogeny of SARS-CoV-2 of mink-1 and humans from Netherlands. For mink-1, only non-redundant and no ambiguous site sequences were included. For SARS-CoV-2 from humans only sequences with lesser than 99.9% nucleotide identify were retained. Red branches are positive selected lineage identified by the adaptive branch-site random effects likelihood method.

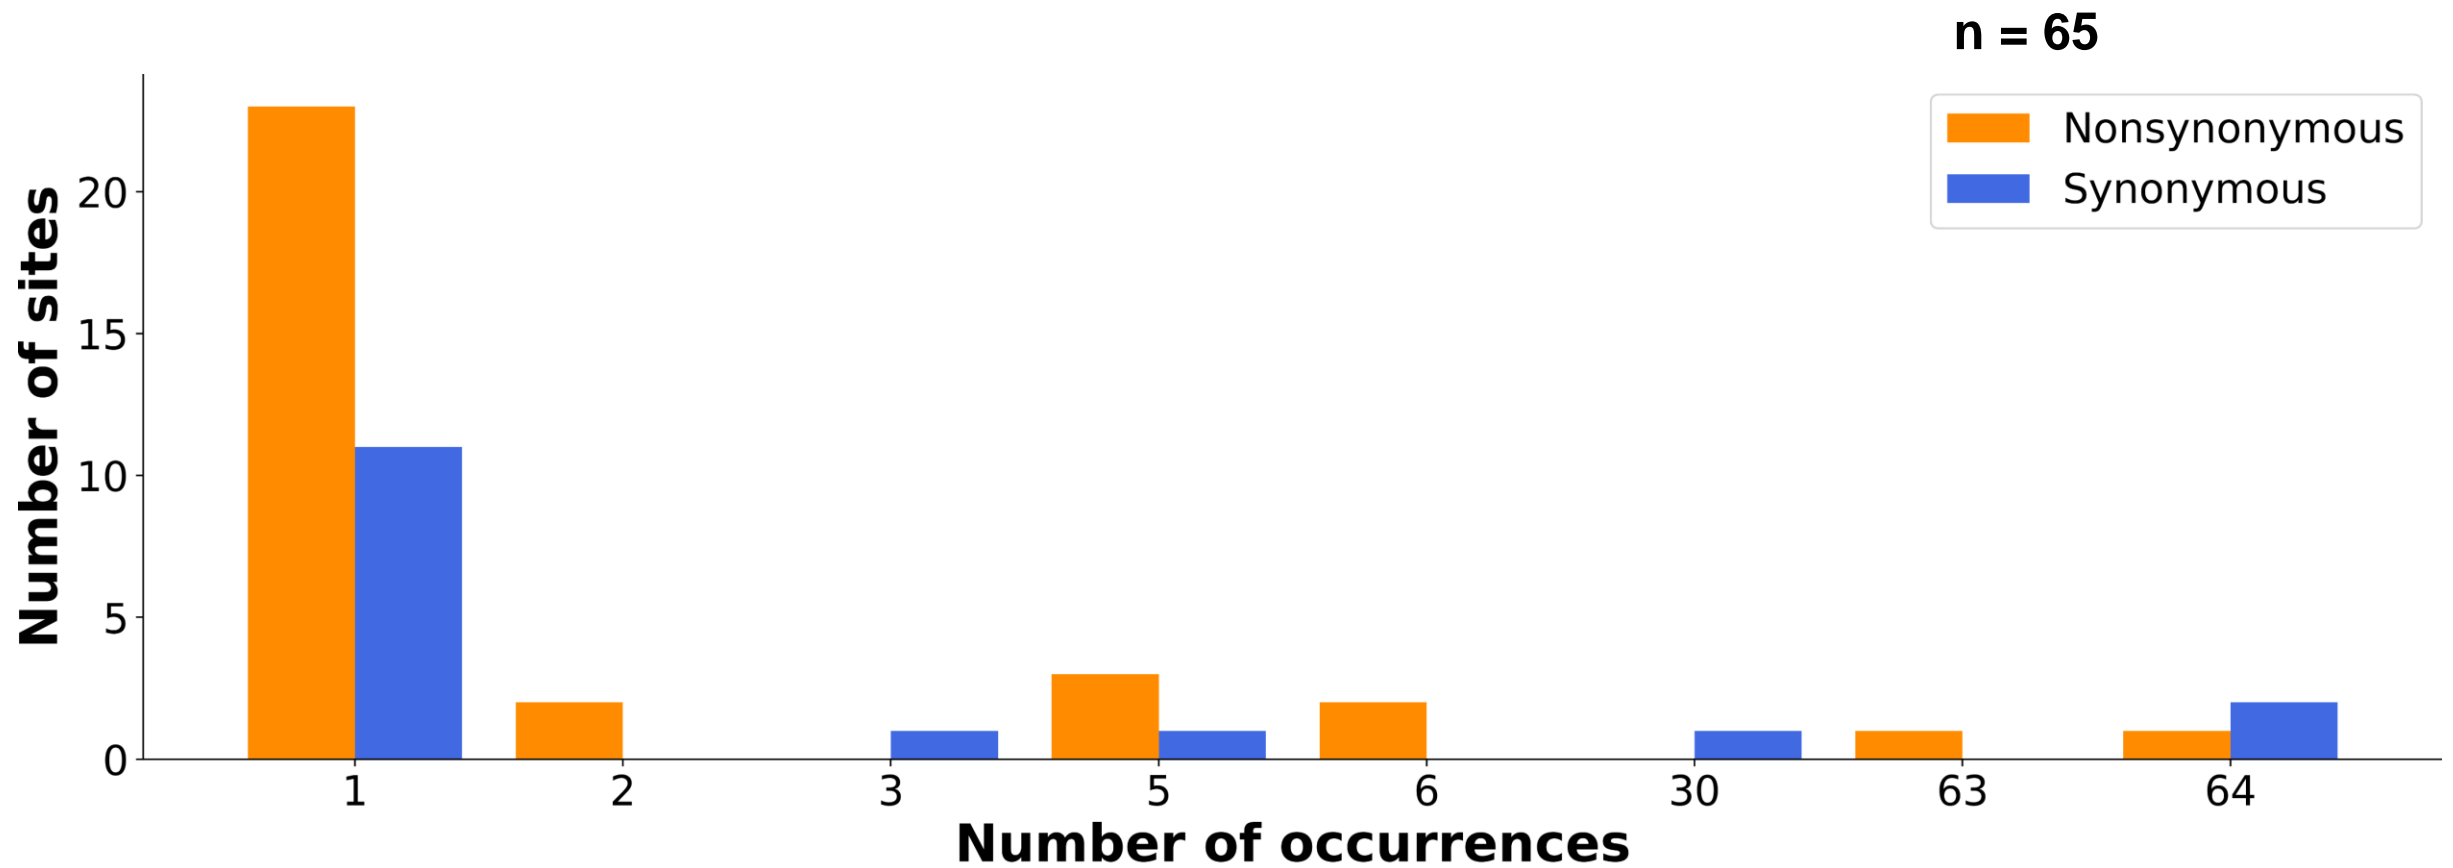

**Fig. S2a. Site frequency spectra of mink-1 during the last phase I of epidemic (August and September 2020) . Significant deviation from neutral expectation was found in both nonsynonymous and synonymous mutations ( $p < 0.01$ )**

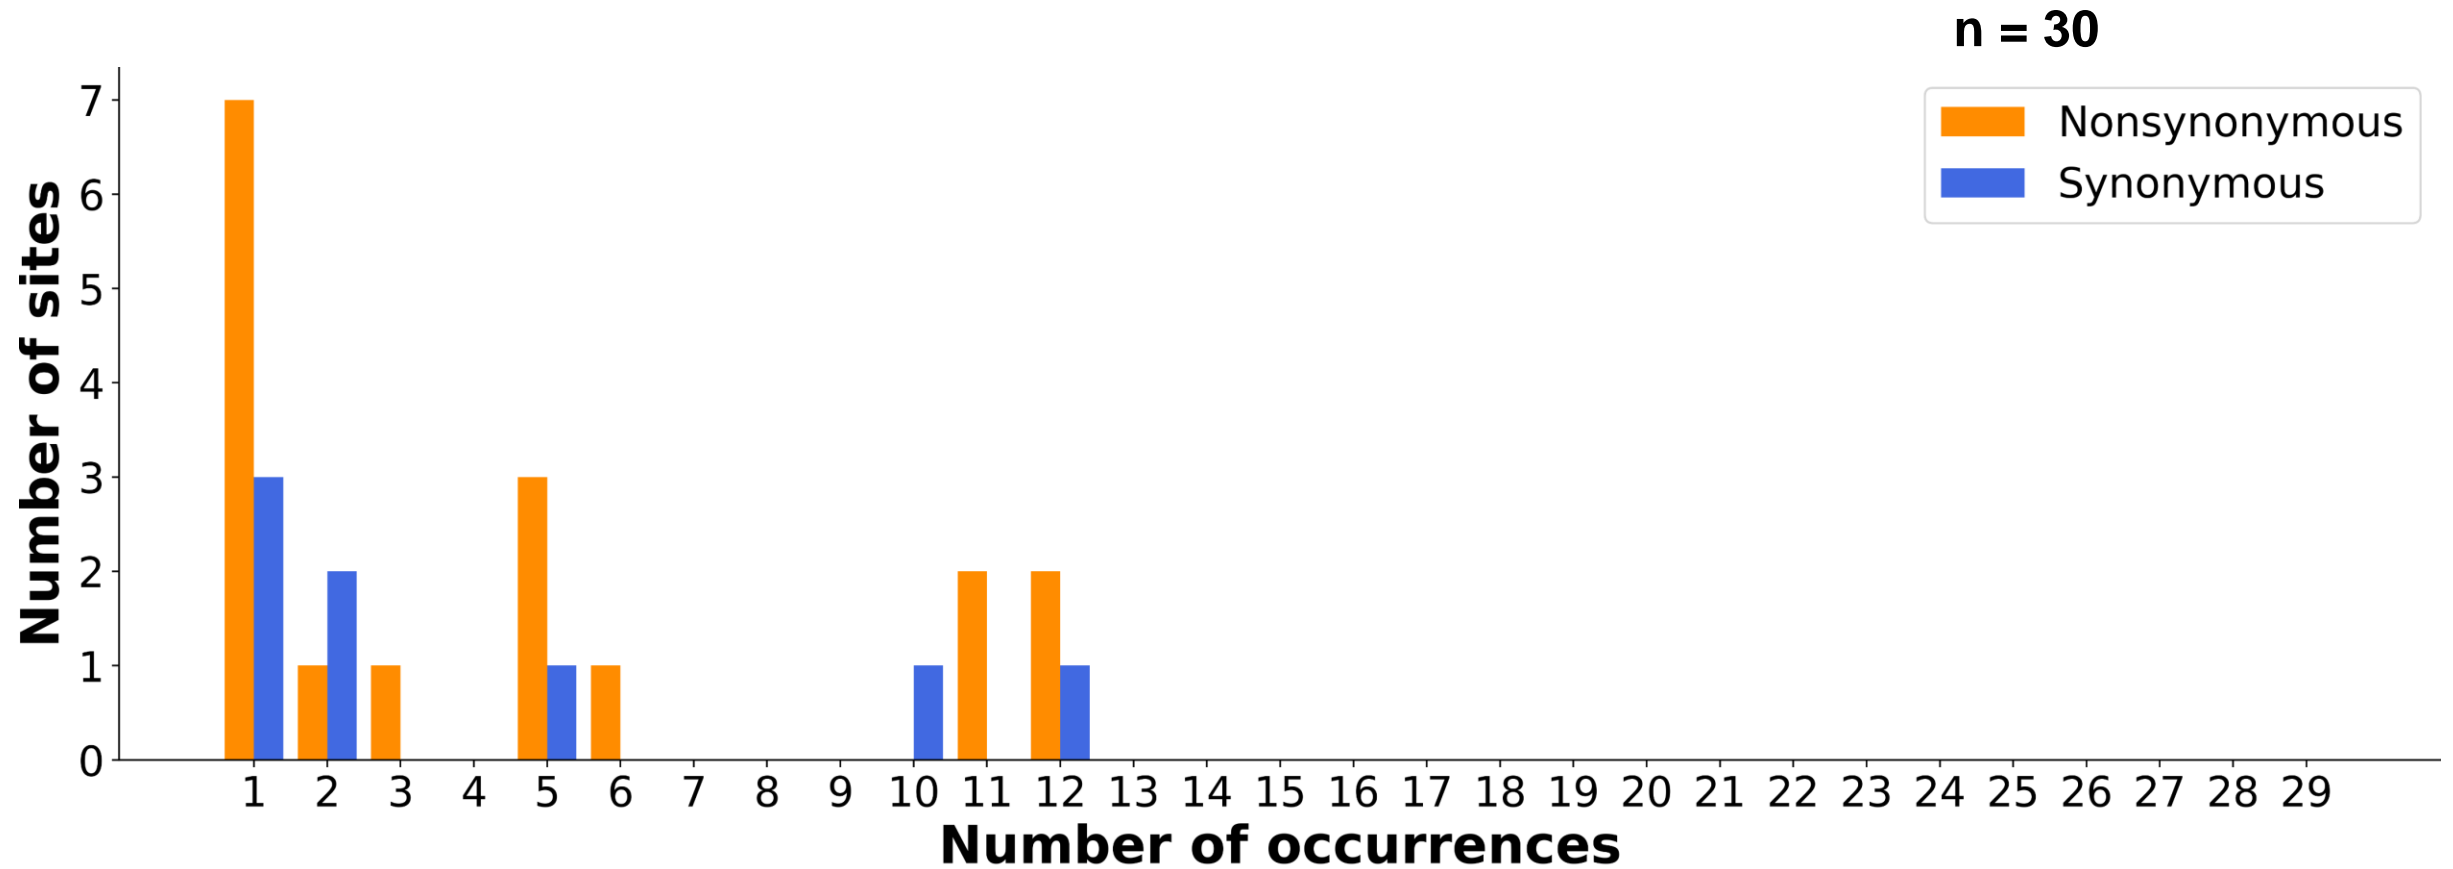

**Fig. S2b. Site frequency spectra of mink-1 during the last phase II of epidemic (October and November 2020) . Significant deviation from neutral expectation is only found in nonsynonymous mutations ( $p = 0.02$ ).**

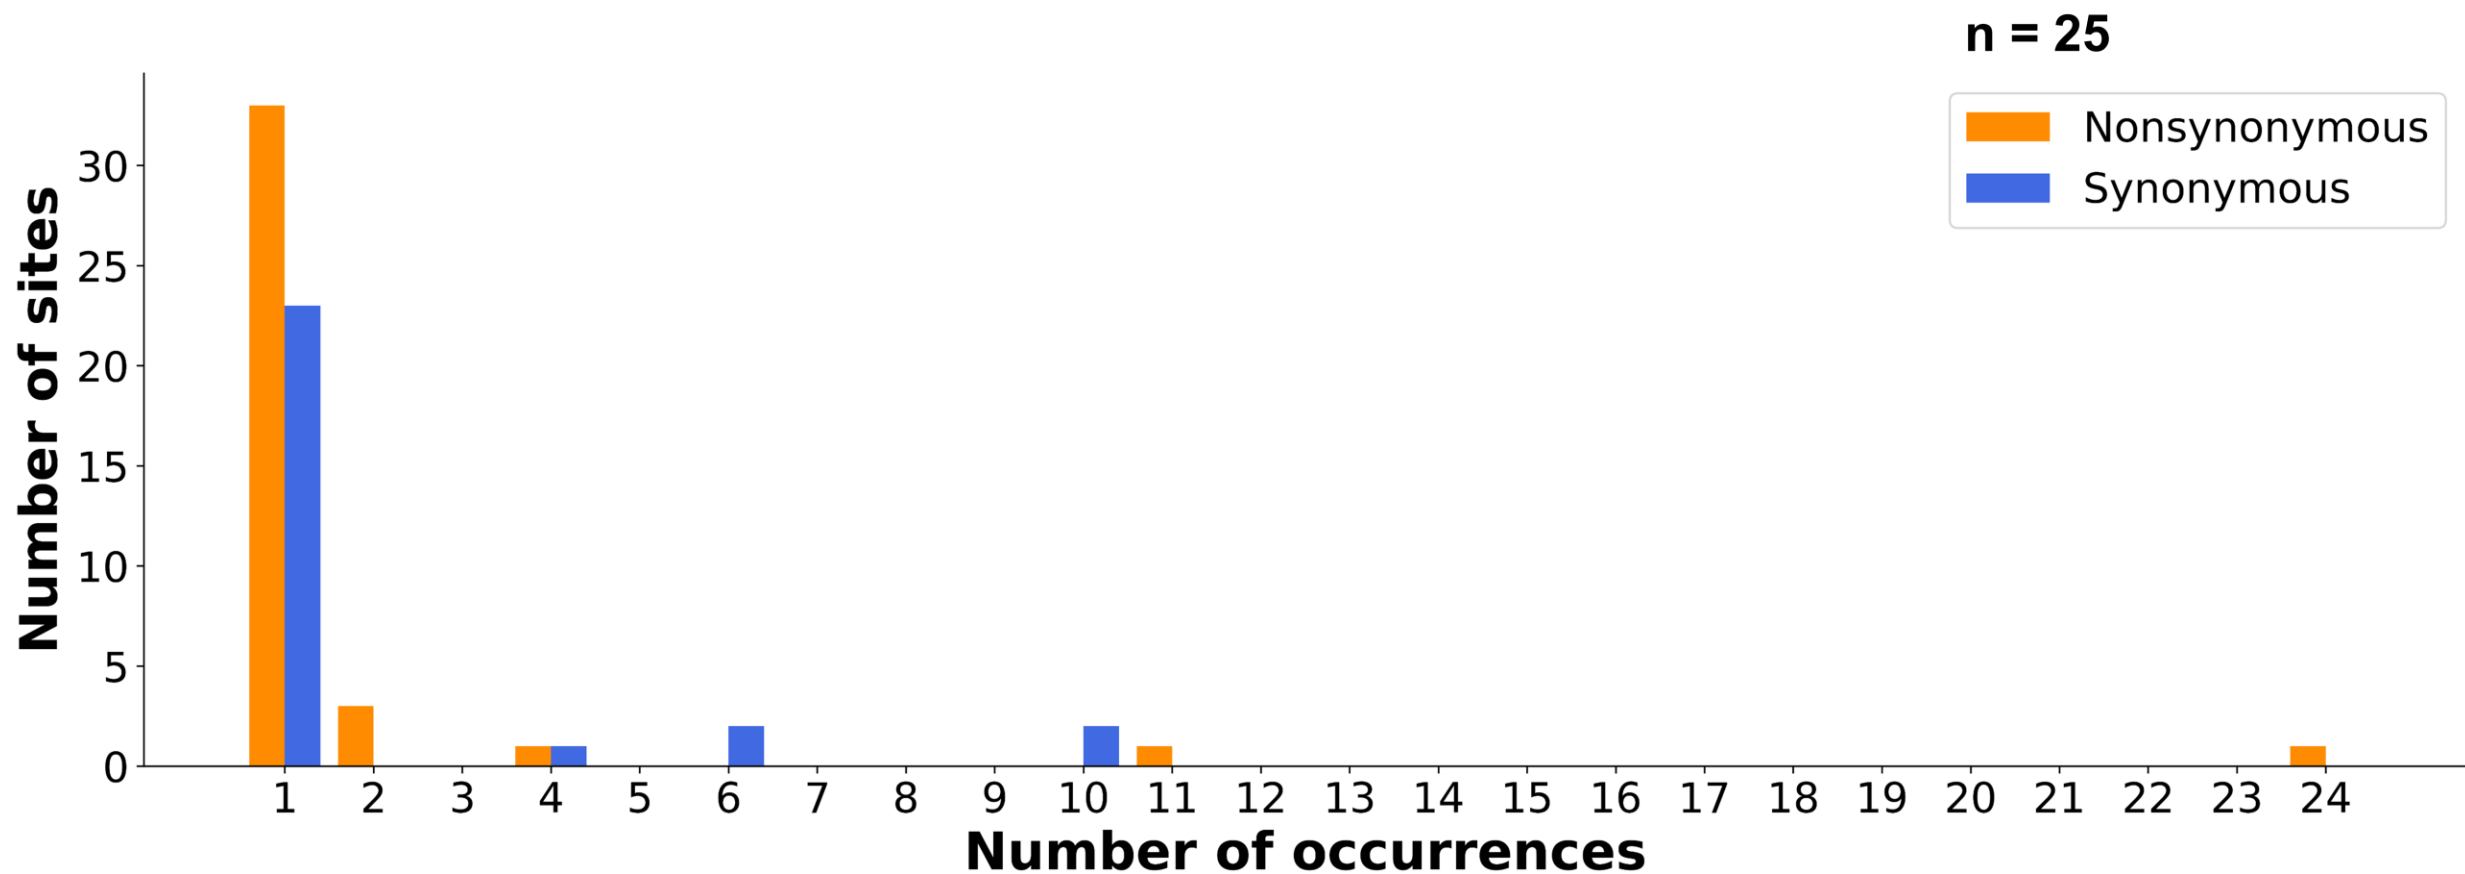

**Fig. S3 Site frequency spectra of SARS-CoV during the last phase of epidemic in 2003.** Significant deviation from neutral expectation was found in nonsynonymous ( $p < 0.02$ ) and synonymous ( $p < 0.05$ ) mutations.

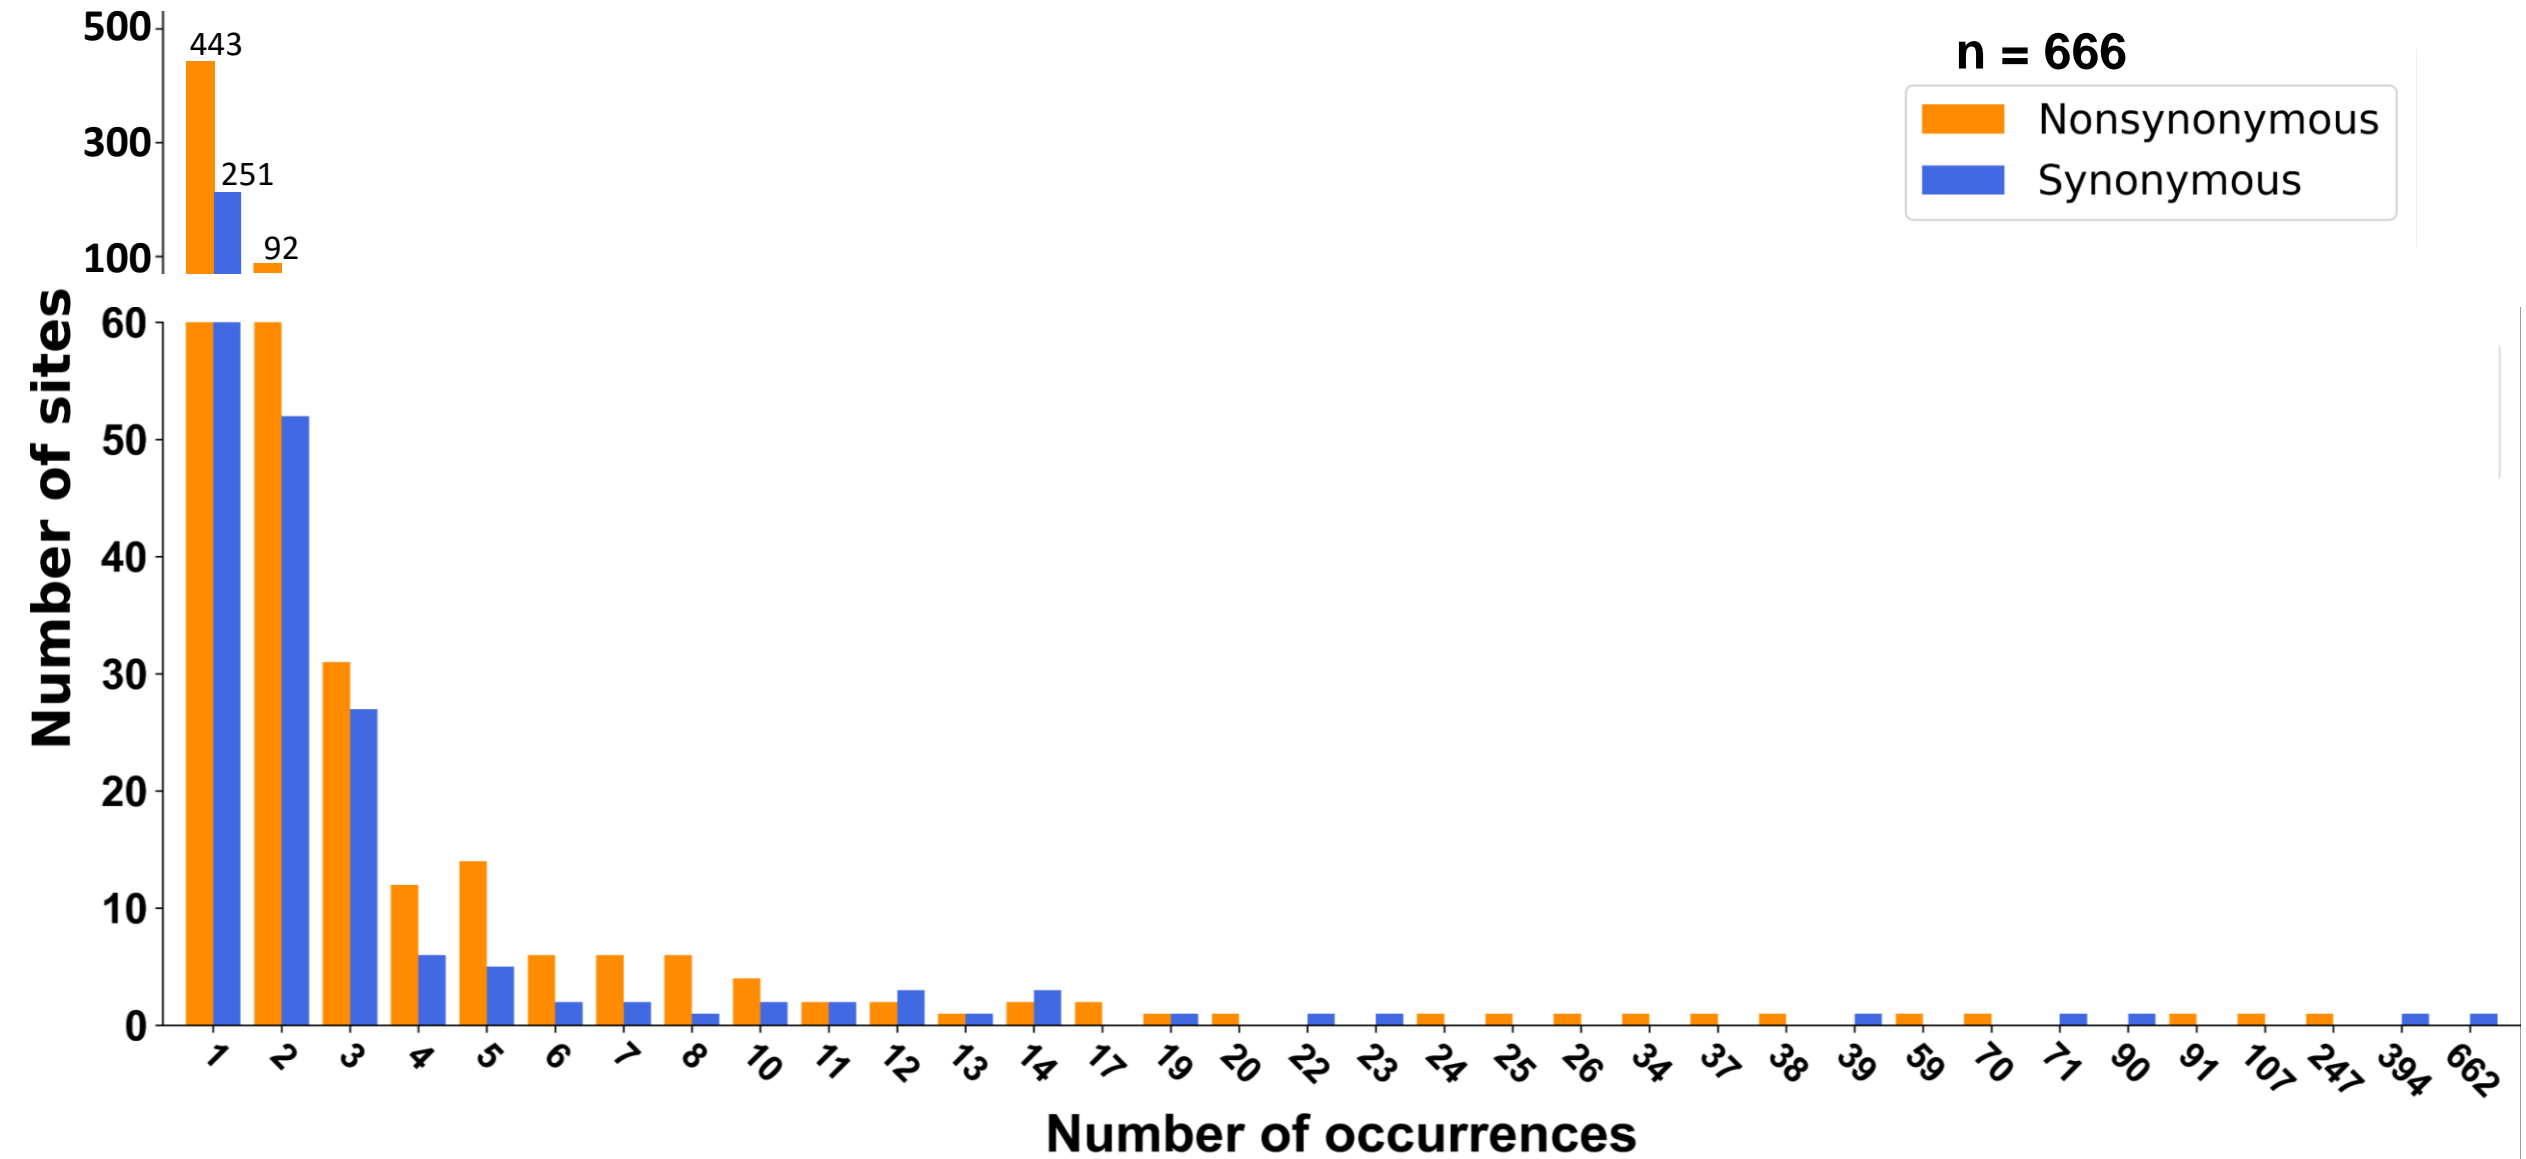

**Fig. S4 Site frequency spectra of B.1.351 with 215G in Spike.** Significant deviation from neutral expectation was only found in synonymous ( $p < 10^{-2}$ ) mutations.

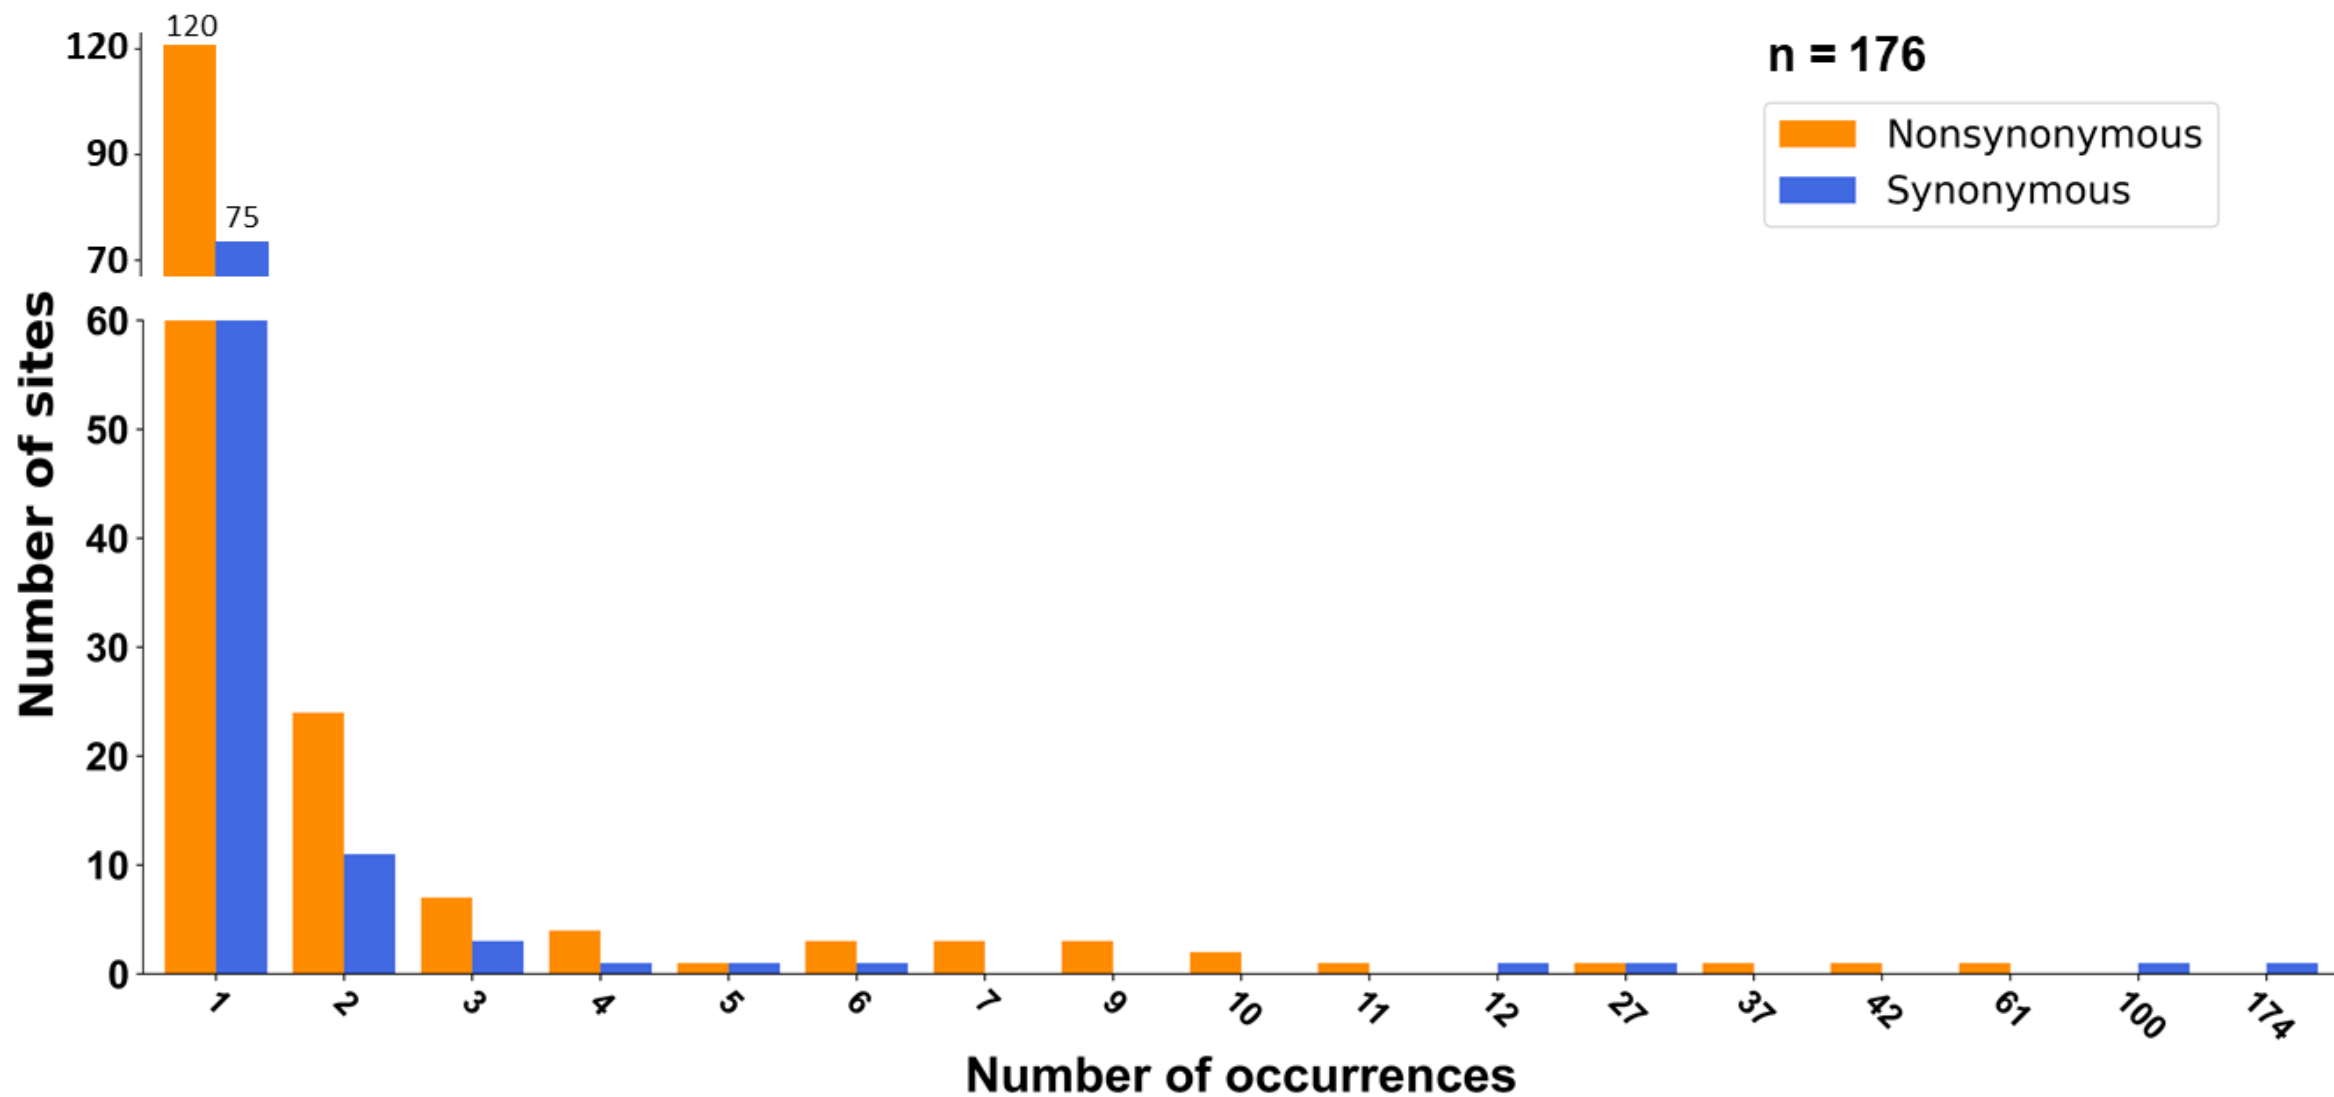

**Fig. S5a Site frequency spectra of B.1.351 strains carrying 215G in Spike in sequences collected in November 2020. Significant deviation from neutral expectation was only found in synonymous ( $p < 10^{-2}$ ) mutations.**

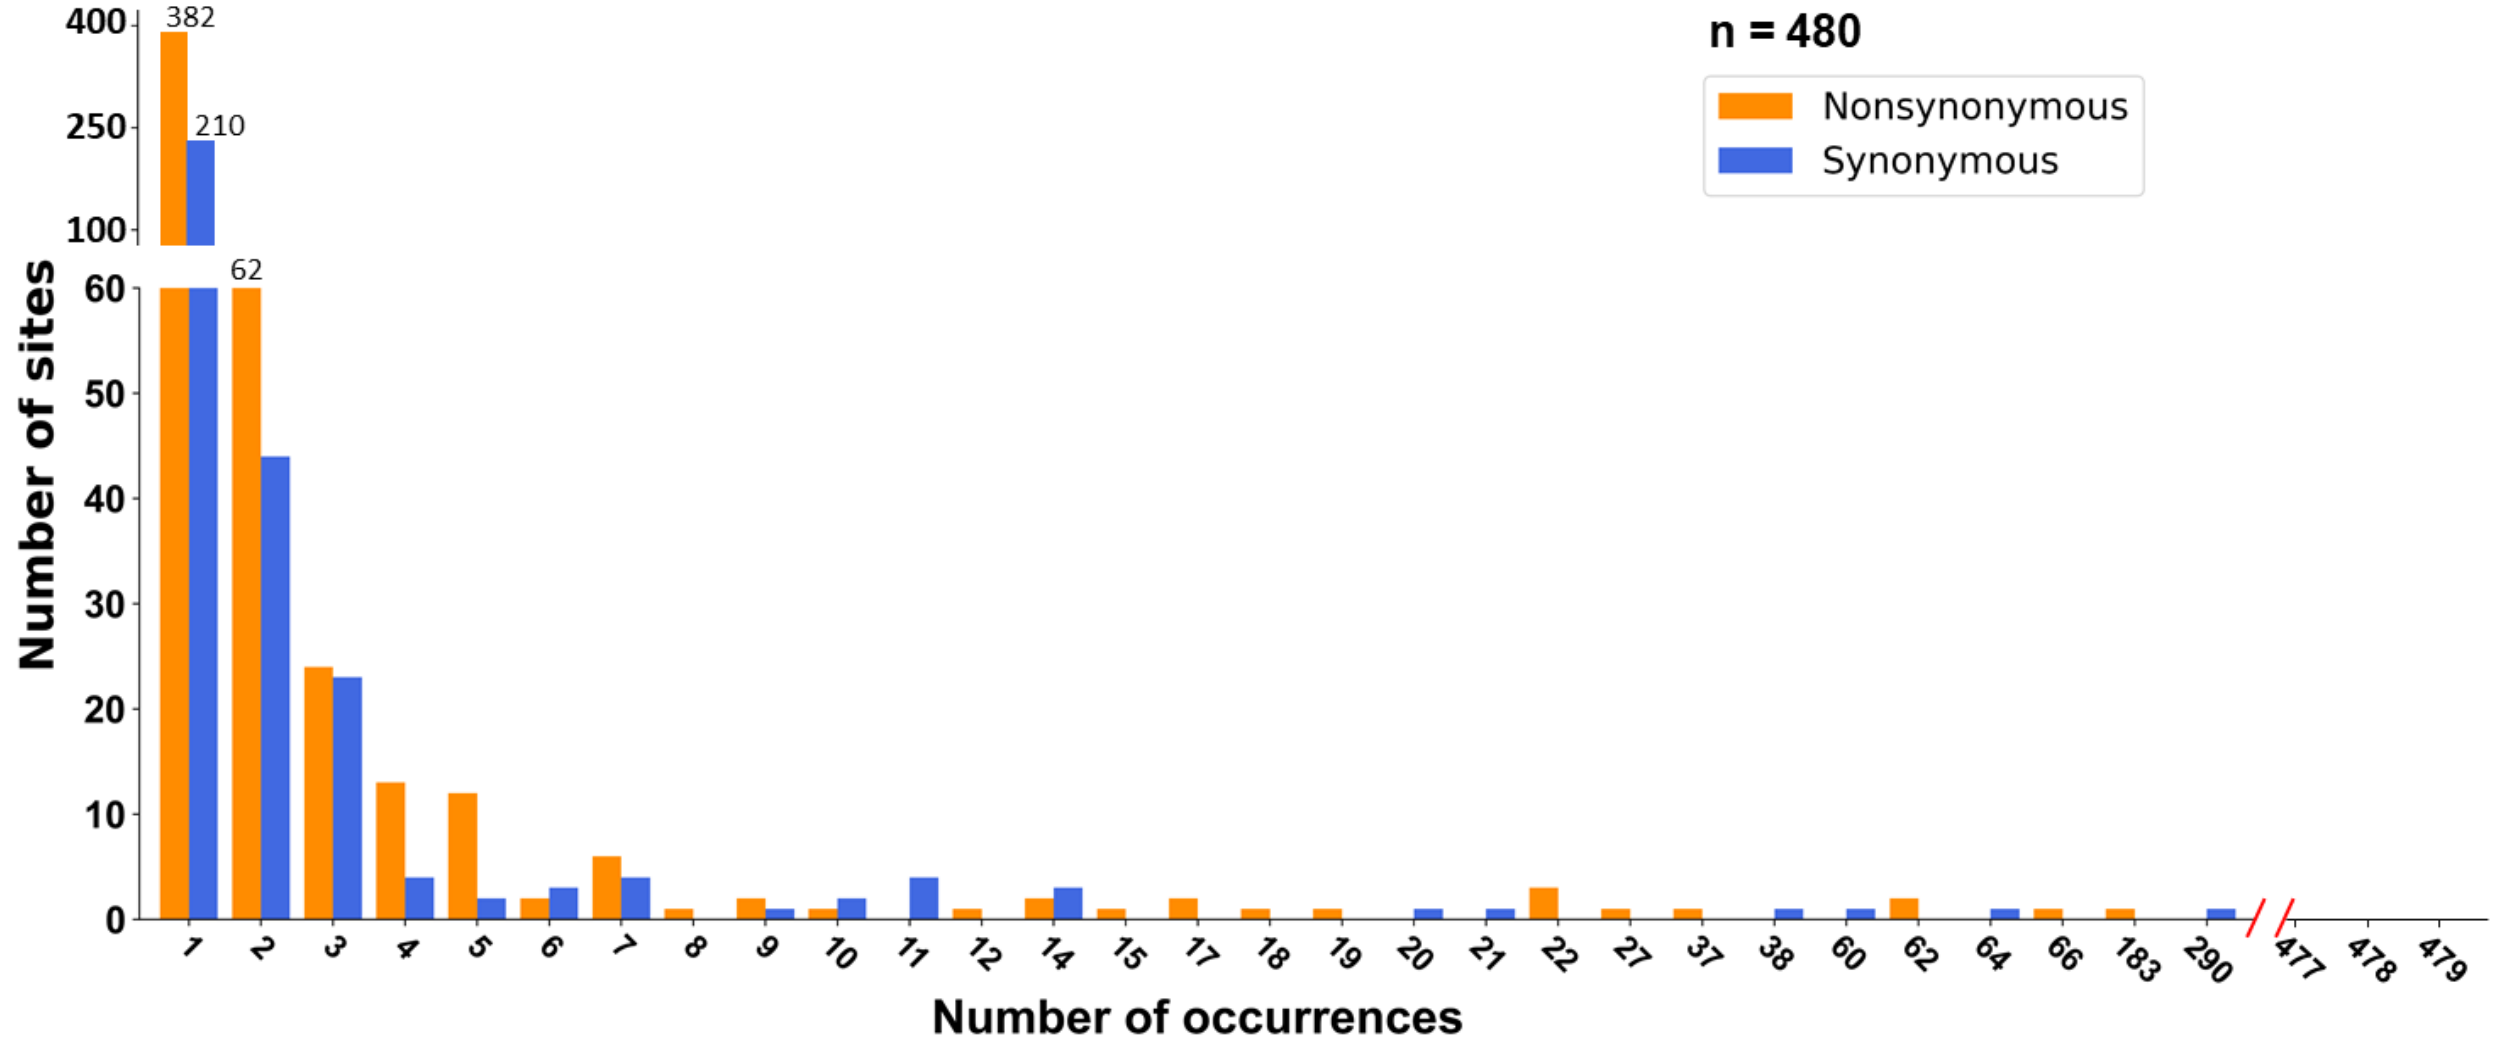

**Fig. S5b Site frequency spectra of B.1.351 strains carrying 215G in Spike in sequences collected in December 2020. No effect of genetic hitchhiking was.**
